# Supplementary material for: Surfactant-assisted mesopores in hierarchical metal–organic frameworks for the immobilization of model protein Cyt c
Source: Royal Society of Chemistry journal article supplement (doi:10.1039/d3dt01087b), 2023-01-01
Supplement: d3dt01087b1.pdf [file d3dt01087b1.pdf]

# Surfactant-Assisted Mesopores in Hierarchical Metal-Organic Frameworks for Immobilization of model protein Cyt c

*Xiaodong Feng,<sup>a</sup> Lihui Liu,<sup>a</sup> Yeming Wang,<sup>a</sup> Chaoqun Zhang,<sup>a</sup> Gang Liu,<sup>a\*</sup> Yuyang Tian<sup>b\*</sup> and*

*Guangshan Zhu<sup>b</sup>*

<sup>a</sup>Research Institute of Chemical and Industrial Bioengineering, Jilin Engineering Normal University, Changchun 130000, China.

<sup>b</sup>Key Laboratory of Polyoxometalate Science of the Ministry of Education, Faculty of Chemistry, Northeast Normal University, Changchun 130000, China.

E-mail for correspondence: lg2010919@163.com, tianyy100@nenu.edu.cn

## Table of Contents

|                                                                                                                               |   |
|-------------------------------------------------------------------------------------------------------------------------------|---|
| 1. N <sub>2</sub> sorption isotherm and micropore diameter distributions. ....                                                | 3 |
| 2. Calibration curves of Cyt c .....                                                                                          | 3 |
| 3. The UV-vis spectra of Cyt c supernatants after loading .....                                                               | 4 |
| 4. Double reciprocal plots of H <sub>2</sub> O <sub>2</sub> concentrations with activities for free Cyt c and Cyt c @H-mMOF-1 | 4 |
| 5. Recycling catalytic relative activity of Cyt c@H-mMOF-1.....                                                               | 5 |
| 6. Loading capacity of H-mMOF-1-H1, H2 and H3 for Cyt c.....                                                                  | 5 |
| 7. Kinetic Parameters of free Cyt c and Cyt c @H-mMOF-1 .....                                                                 | 5 |

## 1. N<sub>2</sub> sorption isotherm and micropore diameter distributions.

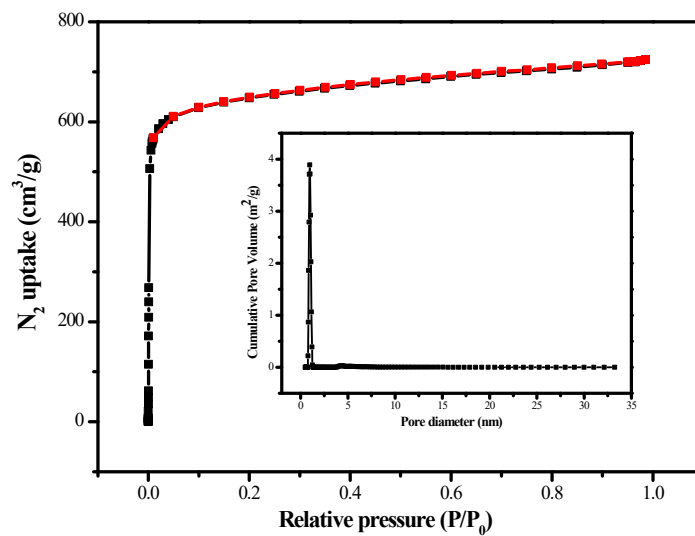

Fig. S1 N<sub>2</sub> sorption isotherm of medi-MOF-1 and micropore diameter distributions.

## 2. Calibration curves of Cyt c

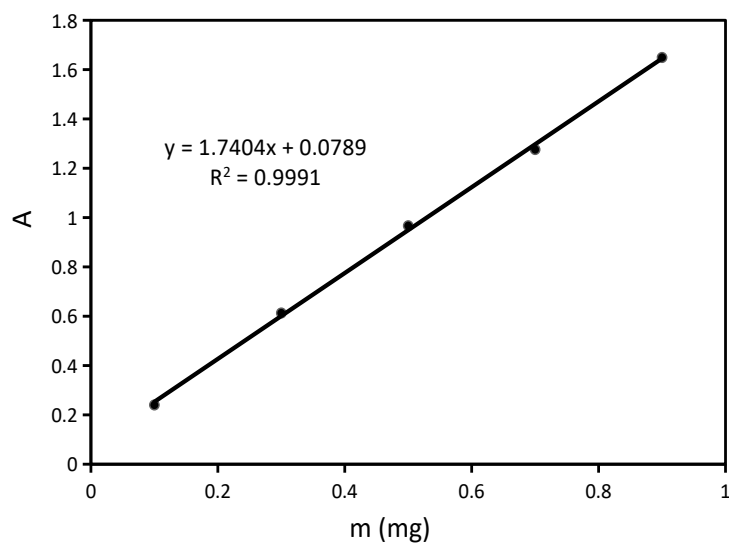

Fig. S2 Calibration curves of Cyt c.

### 3. The UV-vis spectra of Cyt c supernatants after loading

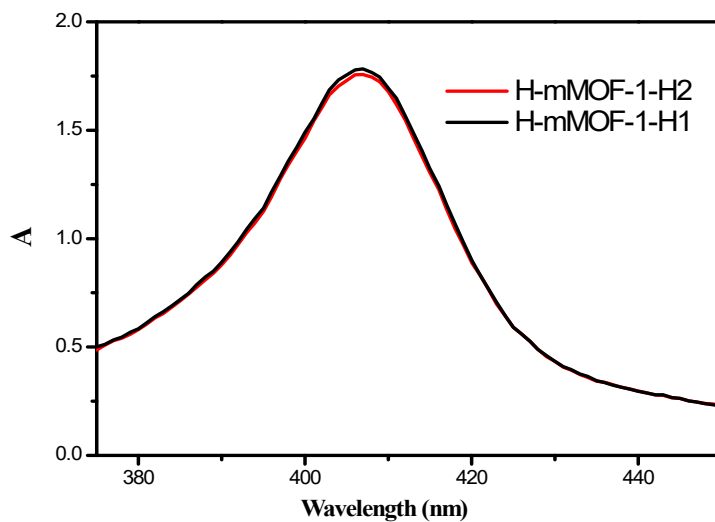

Fig. S3 UV-vis spectra of Cyt c supernatants after loading.

### 4. Double reciprocal plots of H<sub>2</sub>O<sub>2</sub> concentrations with activities for free Cyt c and Cyt c @H-mMOF-1

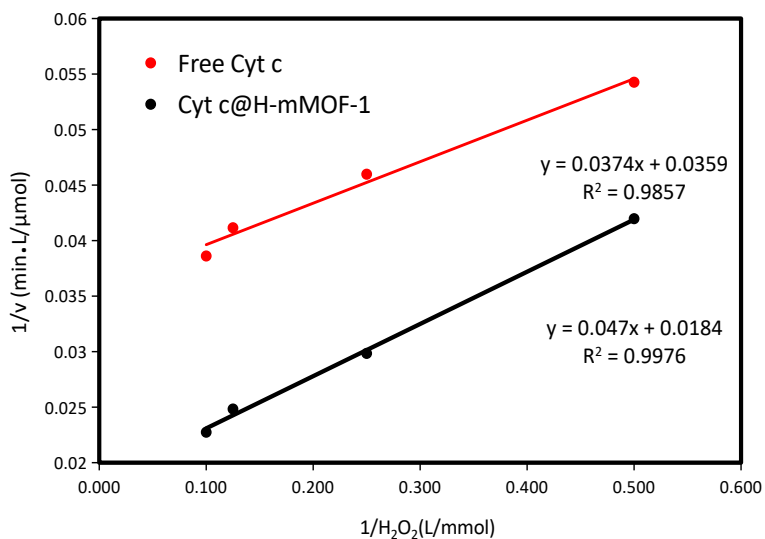

Fig. S4 Double reciprocal plots of H<sub>2</sub>O<sub>2</sub> concentrations with activities for free Cyt c and Cyt c @H-mMOF-1.

## 5. Recycling catalytic relative activity of Cyt c@H-mMOF-1.

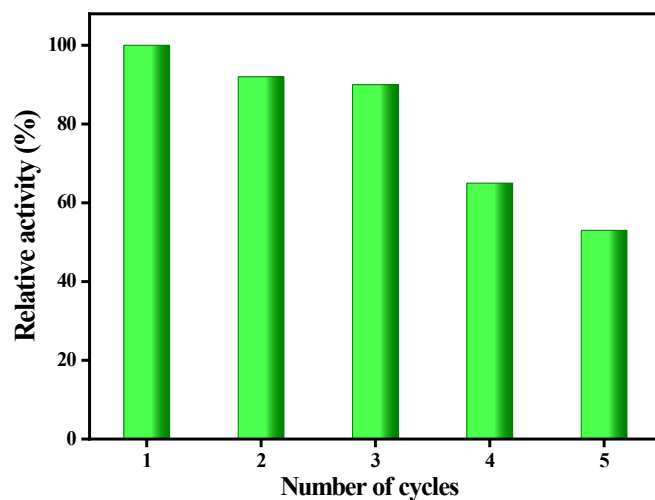

Fig. S5 Recycling catalytic relative activity of Cyt c@H-mMOF-1.

## 6. Loading capacity of H-mMOF-1-H1, H2 and H3 for Cyt c

Table S1 Loading capacity of H-mMOF-1-H1, H2 and H3 for Cyt c

| Samples | Mesopore size (nm) | loading capacity (mg/g) |
|---------|--------------------|-------------------------|
| H1      | 2.5, 3.6           | 36.15                   |
| H2      | 3.7, 5.0           | 42.34                   |
| H3      | 3.9, 5.0, 8.9      | 160.65                  |

## 7. Kinetic Parameters of free Cyt c and Cyt c @H-mMOF-1

Table S2 Kinetic Parameters of free Cyt c and Cyt c @H-mMOF-1.

| Samples         | $K_m$ (mmol/L) | $V_{max}$ ( $\mu\text{mol}/(\text{L} \cdot \text{min})$ ) |
|-----------------|----------------|-----------------------------------------------------------|
| Free Cyt c      | 0.96           | 27.86                                                     |
| Cyt c @H-mMOF-1 | 0.39           | 54.35                                                     |
